# Supplementary material for: Doped TiO2-supported IrO2 electrocatalysts with high activity and durability toward the acidic oxygen evolution reaction
Source: Royal Society of Chemistry journal article supplement (doi:10.1039/d3ce01036h), 2023-12-02
Supplement: d3ce01036h1.pdf [file d3ce01036h1.pdf]

## Supporting Information

### Doped TiO<sub>2</sub>-Supported IrO<sub>2</sub> Electrocatalyst with High Activity and Durability toward the Acidic Oxygen Evolution Reaction

Zhen Fang,<sup>†a,e</sup> Zhongmin Tang,<sup>†\*b</sup> Senming Lin,<sup>b</sup> Runhua Li,<sup>a,e</sup> Xiaomei Chen,<sup>b</sup> Jiakang Tian,<sup>a,e</sup> Lijiang Liu,<sup>b</sup> Jiaheng Peng,<sup>\*a,e</sup> Shuai Liu,<sup>b</sup> Benwei Fu,<sup>a</sup> Tao Deng,<sup>\*a,c</sup> and Jianbo Wu<sup>\*a,c,d,e</sup>

<sup>a</sup>State Key Laboratory of Metal Matrix Composites, School of Materials Science and Engineering, Shanghai Jiao Tong University, Shanghai 200240, P. R. China.

E-mail:

[jianbowu@sjtu.edu.cn](mailto:jianbowu@sjtu.edu.cn)

[dengtao@sjtu.edu.cn](mailto:dengtao@sjtu.edu.cn)

[pengjiaheng\\_2016@sjtu.edu.cn](mailto:pengjiaheng_2016@sjtu.edu.cn)

<sup>b</sup>Emergency Rescue Center of Xinjiang Oilfield Company.

E-mail:

[yjyjtangzm@petrochina.com.cn](mailto:yjyjtangzm@petrochina.com.cn)

#### Characterization data

**Figure S1.** TEM images, SAED patterns, HAADF-STEM images and EDS elemental mappings of TiO<sub>2</sub>@IrO<sub>2</sub>.

**Figure S2.** TEM images, SAED patterns, HAADF-STEM images and EDS elemental mappings of V-TiO<sub>2</sub>@IrO<sub>2</sub>.

**Figure S3.** TEM images, SAED patterns, HAADF-STEM images and EDS elemental mappings of Mn-TiO<sub>2</sub>@IrO<sub>2</sub>.

**Figure S4.** TEM images, SAED patterns, HAADF-STEM images and EDS elemental mappings of Fe-TiO<sub>2</sub>@IrO<sub>2</sub>.

**Figure S5.** TEM images, SAED patterns, HAADF-STEM images and EDS elemental mappings of Ni-TiO<sub>2</sub>@IrO<sub>2</sub>.

**Figure S6.** TEM images, SAED patterns, HAADF-STEM images and EDS elemental mappings of Cu-TiO<sub>2</sub>@IrO<sub>2</sub>.

**Figure S7.** TEM images, SAED patterns, HAADF-STEM images and EDS elemental mappings of Nb-TiO<sub>2</sub>@IrO<sub>2</sub>.

**Figure S8.** Electrocatalysis OER stability test of unsupported IrO<sub>2</sub>, TiO<sub>2</sub>@IrO<sub>2</sub>, Fe-TiO<sub>2</sub>@IrO<sub>2</sub>, and W-TiO<sub>2</sub>@IrO<sub>2</sub> (lasting for 3.1 h).

**Table S1.** Performance table of Ir-based electrocatalysts.

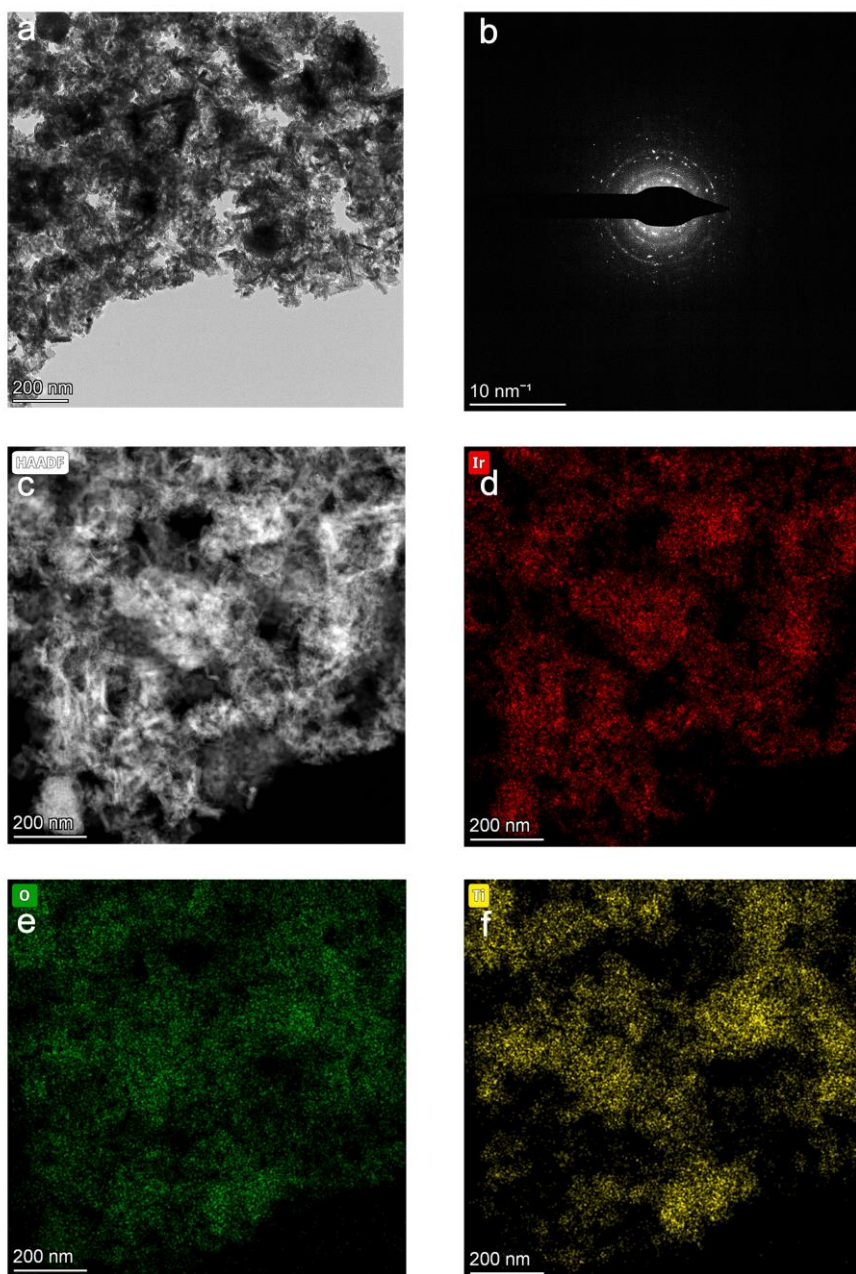

**Figure S1.** TEM images, SAED patterns, HAADF-STEM images and EDS elemental mappings of  $\text{TiO}_2@ \text{IrO}_2$ .

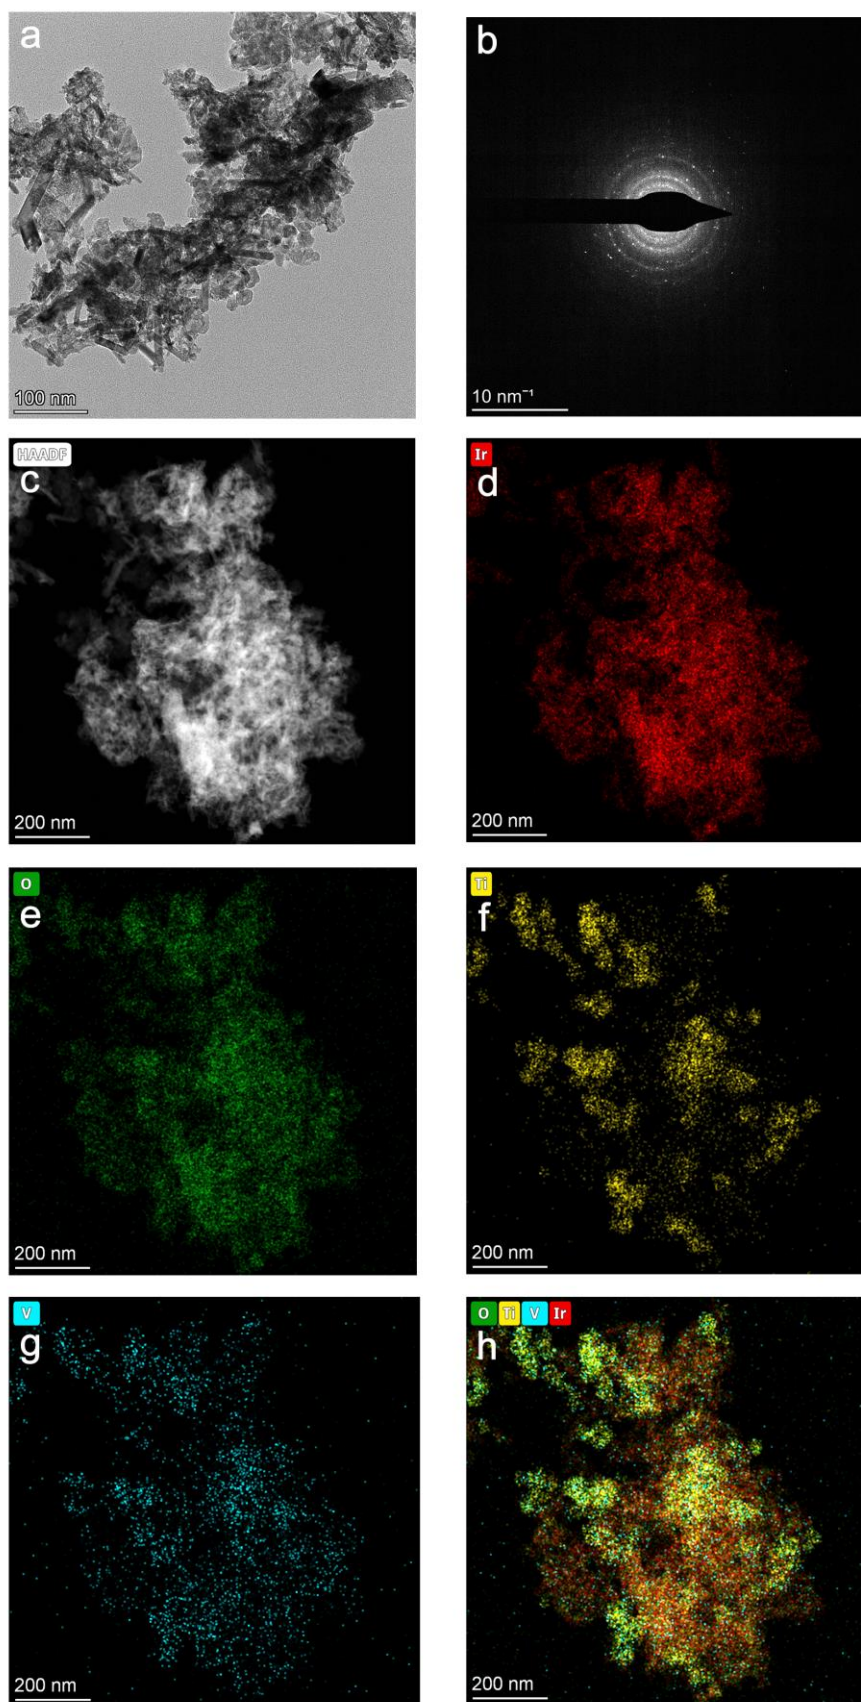

**Figure S2.** TEM images, SAED patterns, HAADF-STEM images and EDS elemental mappings of V-TiO<sub>2</sub>@IrO<sub>2</sub>.

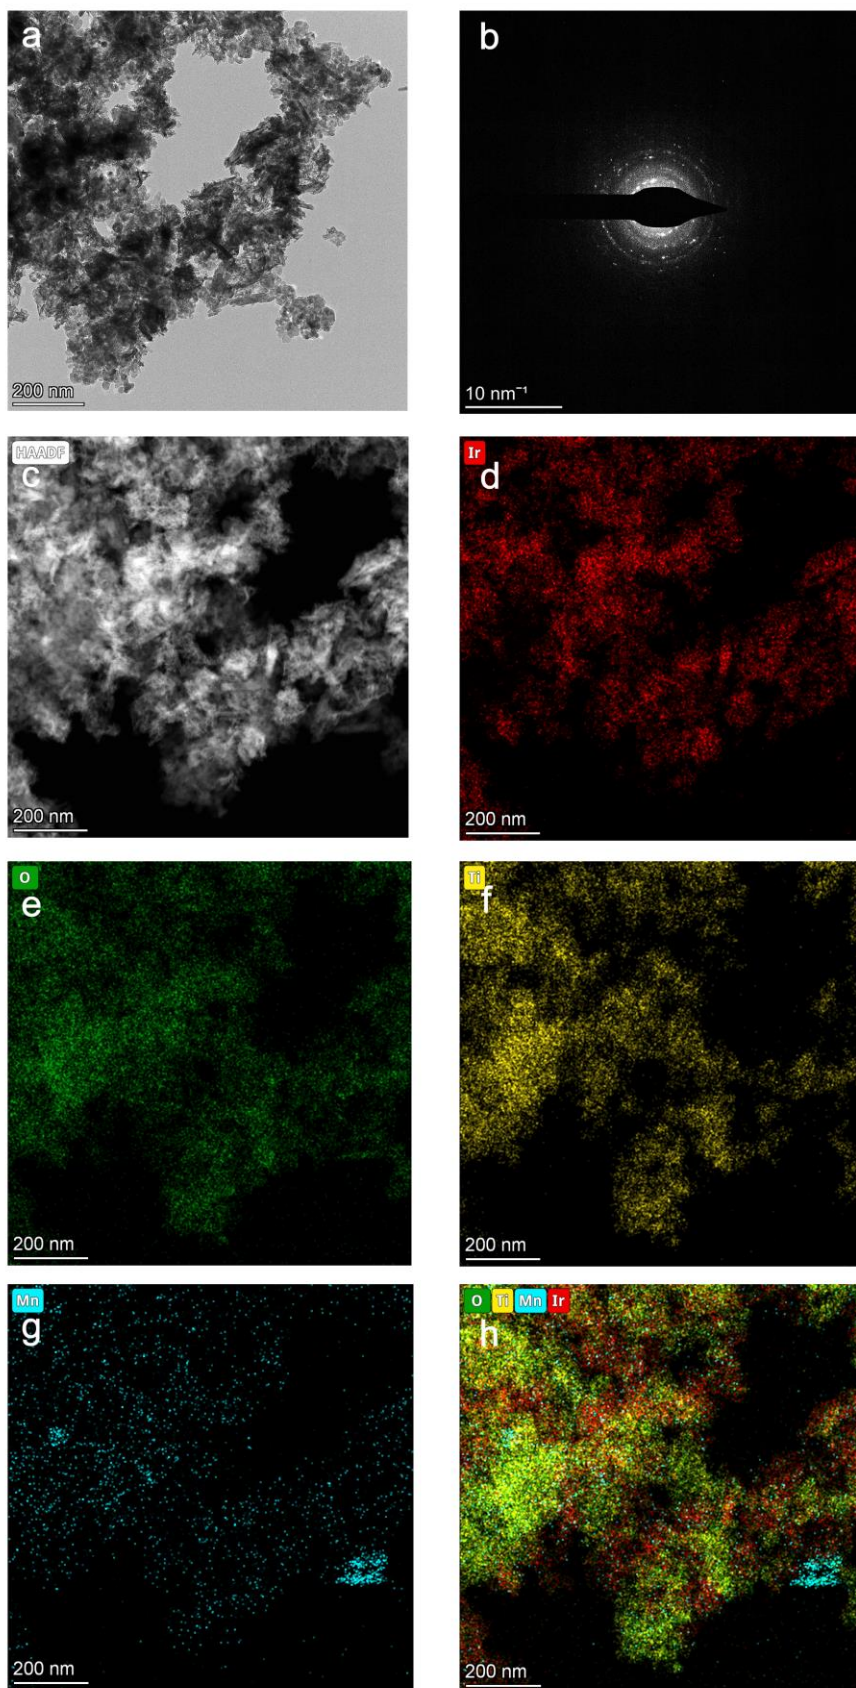

**Figure S3.** TEM images, SAED patterns, HAADF-STEM images and EDS elemental mappings of Mn-TiO<sub>2</sub>@IrO<sub>2</sub>.

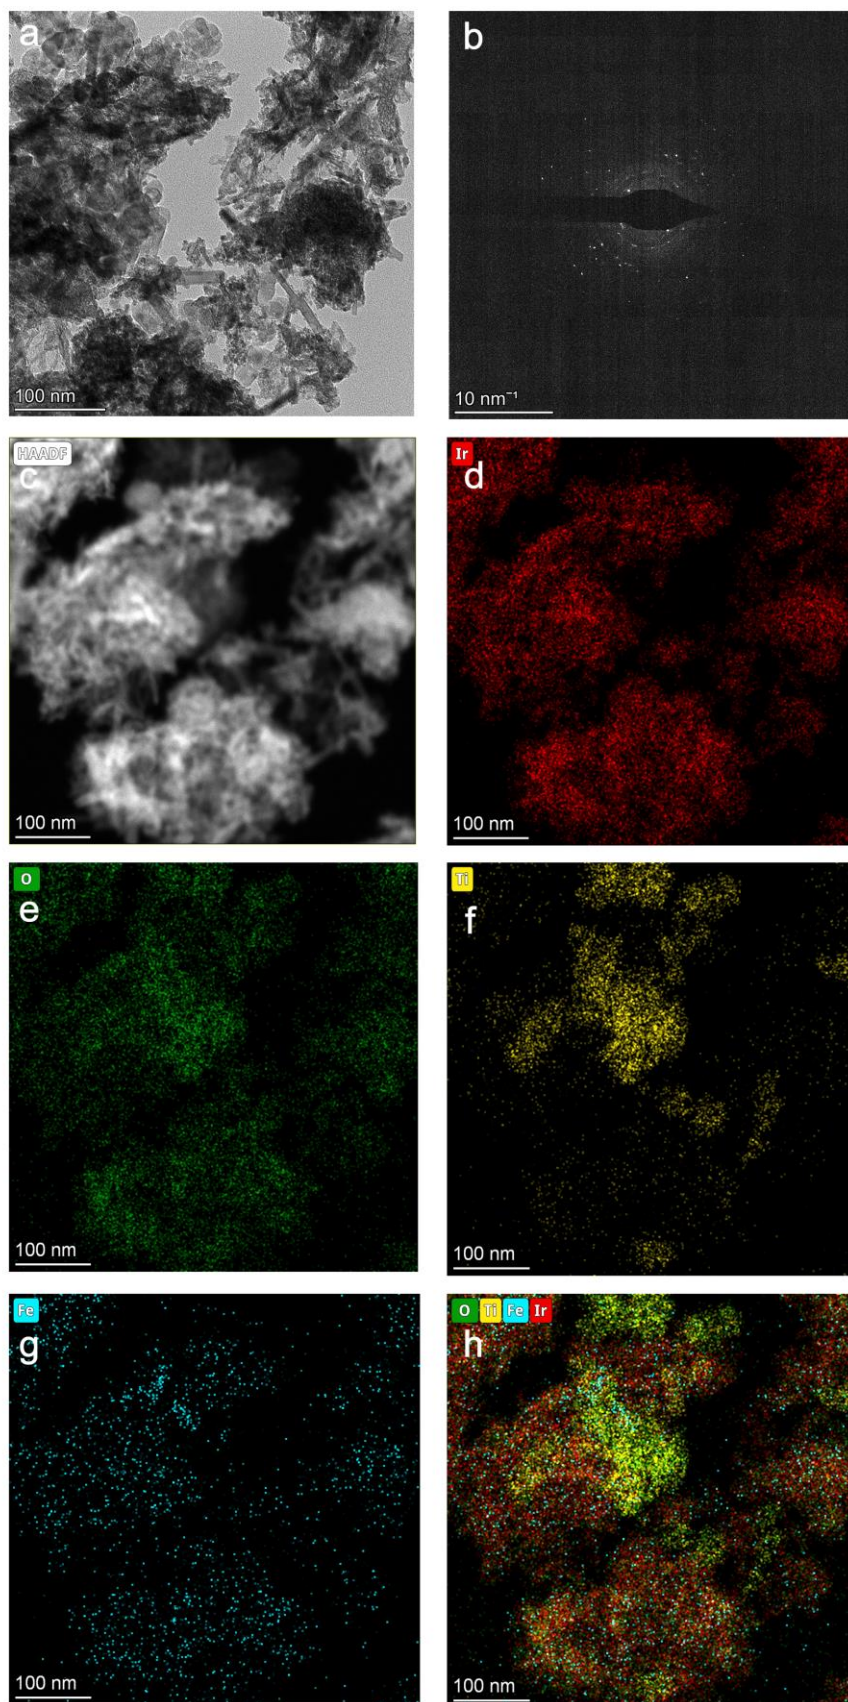

**Figure S4.** TEM images, SAED patterns, HAADF-STEM images and EDS elemental mappings of Fe-TiO<sub>2</sub>@IrO<sub>2</sub>.

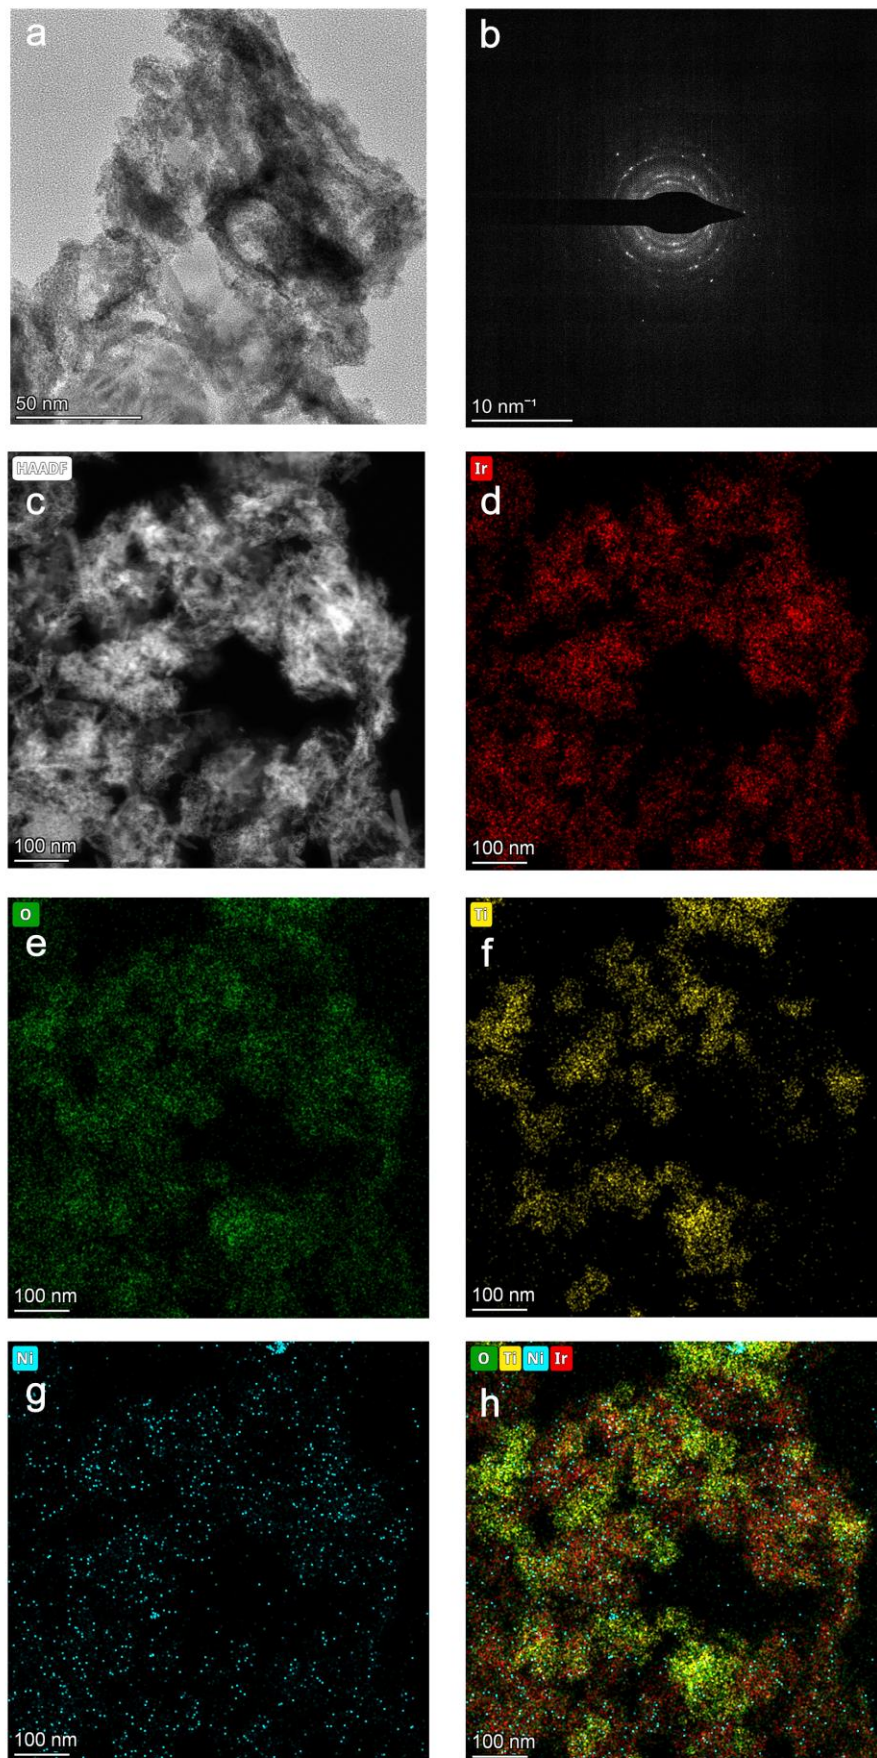

Figure S5. TEM images, SAED patterns, HAADF-STEM images and EDS elemental mappings of Ni-TiO<sub>2</sub>@IrO<sub>2</sub>.

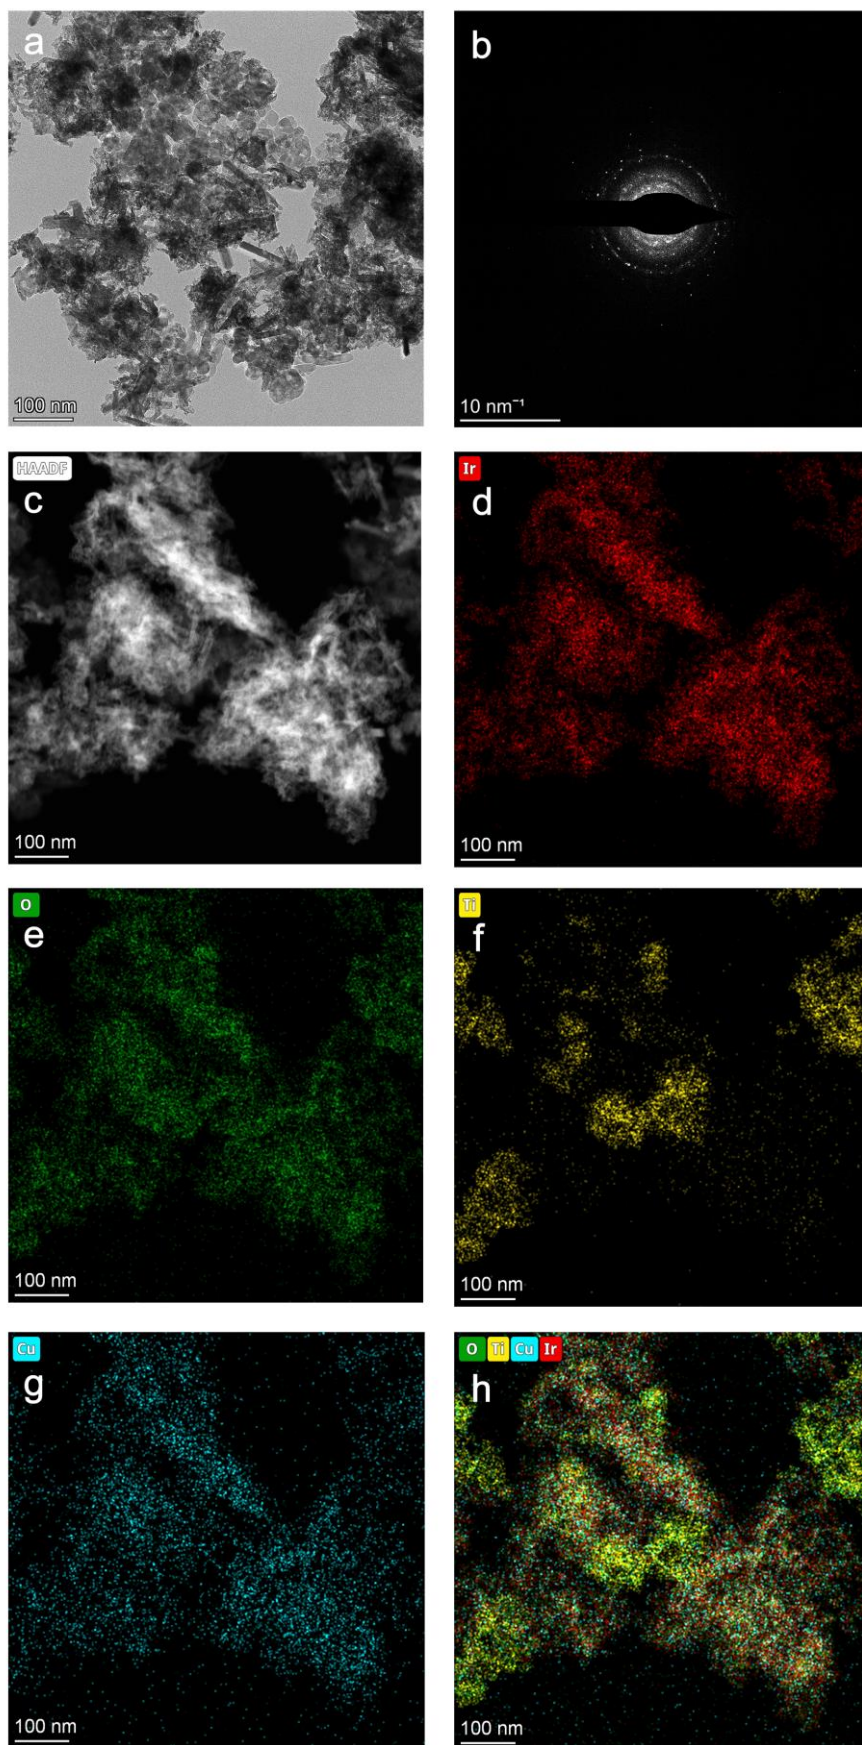

Figure S6. TEM images, SAED patterns, HAADF-STEM images and EDS elemental mappings of Cu-TiO<sub>2</sub>@IrO<sub>2</sub>.

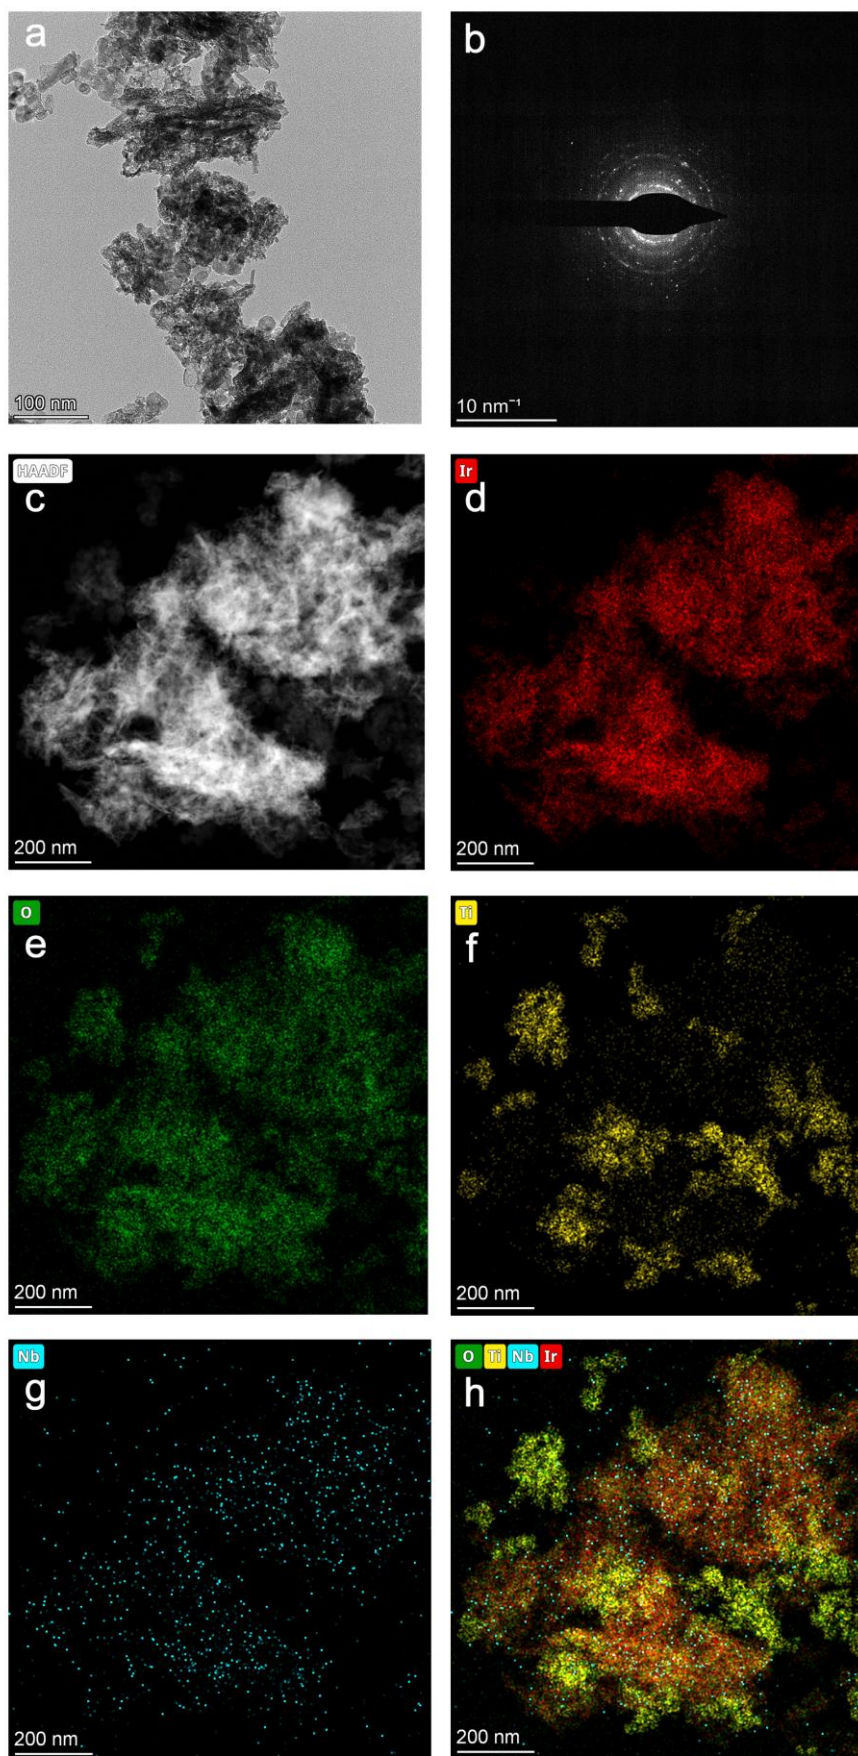

Figure S7. TEM images, SAED patterns, HAADF-STEM images and EDS elemental mappings of Nb-TiO<sub>2</sub>@IrO<sub>2</sub>.



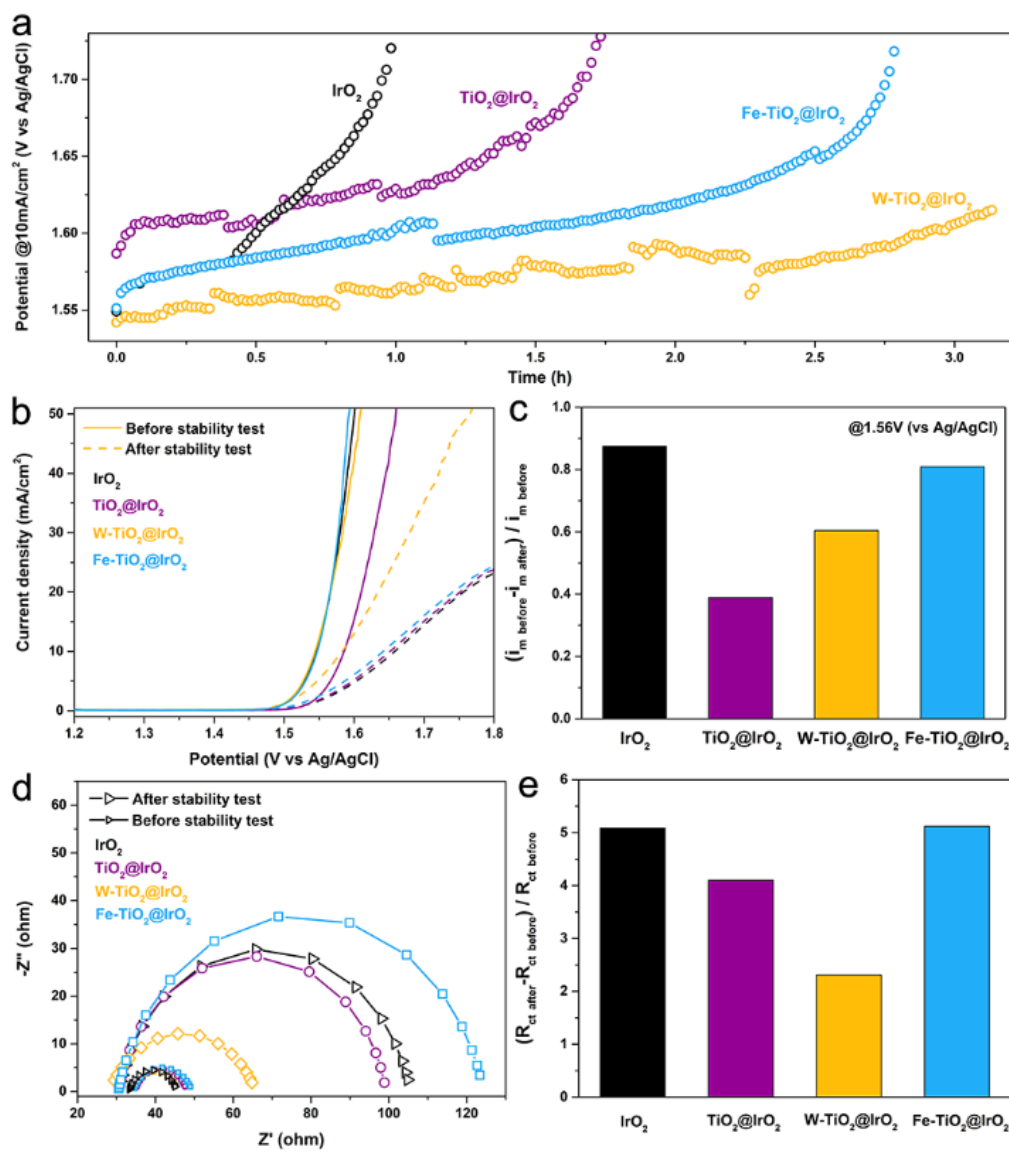

**Figure S8.** Electrocatalysis OER stability test of unsupported IrO<sub>2</sub>, TiO<sub>2</sub>@IrO<sub>2</sub>, Fe-TiO<sub>2</sub>@IrO<sub>2</sub>, and W-TiO<sub>2</sub>@IrO<sub>2</sub> (test lasting for 3.1h). (a) Chronopotentiometry test at 10 mA/cm<sub>2,geo</sub>. (b) OER activity before and after the chronopotentiometry test. (c) The attenuation degree of mass activity ( $i_m$ ) before and after the chronopotentiometry test at 1.56 V (vs Ag/AgCl). (d) Nyquist plots before and after chronopotentiometry test at the potential of 10 mA/cm<sub>2,geo</sub>. (e) The increased degree of  $R_{ct}$  before and after the chronopotentiometry test corresponding to the Nyquist plots.

**Table S1.** Performance table of Ir-based electrocatalysts.

| Catalyst                                                                | Electrolyte                          | Overpotential @10mA/cm <sup>2</sup> (mV) | Tafel slope (mV/dec) | Mass activity (A/mg <sub>Ir</sub> ) @Overpotential (V) | Ref.      |
|-------------------------------------------------------------------------|--------------------------------------|------------------------------------------|----------------------|--------------------------------------------------------|-----------|
| W-TiO <sub>2</sub> /IrO <sub>2</sub>                                    | 0.1M HClO <sub>4</sub>               | 308                                      | 42.36                | 0.72@330                                               | This work |
| IrO <sub>2</sub>                                                        | 0.1M HClO <sub>4</sub>               | 373                                      | 112                  | 0.0126@300                                             | [1]       |
| IrO <sub>2</sub> ns                                                     | 0.5M H <sub>2</sub> SO <sub>4</sub>  | 350                                      | 57                   | 0.437@xx                                               | [2]       |
| Ni&Co-IrO <sub>2</sub>                                                  | 0.1M HClO <sub>4</sub>               | ~280                                     | 53                   | 0.055@270                                              | [3]       |
| TiO <sub>2</sub> /IrO <sub>2</sub>                                      | 0.1M HClO <sub>4</sub>               | 255@1mA/cm <sup>2</sup>                  | 42                   | 0.07@295                                               | [4]       |
| Nb-TiO <sub>2</sub> /IrO <sub>2</sub>                                   | 0.1M HClO <sub>4</sub>               | 310                                      | /                    | /                                                      | [5]       |
| Nb <sub>0.05</sub> TiO <sub>0.95</sub> O <sub>2</sub> /IrO <sub>2</sub> | 0.5M H <sub>2</sub> SO <sub>4</sub>  | 270@1mA/cm <sup>2</sup>                  | 282                  | 0.471@370                                              | [6]       |
| W <sub>x</sub> Ti <sub>1-x</sub> O <sub>2</sub> /Ir                     | 0.1M HClO <sub>4</sub>               | ~300                                     | /                    | ~0.77@570                                              | [7]       |
| TiN/IrO <sub>2</sub>                                                    | 0.5M H <sub>2</sub> SO <sub>4</sub>  | 313                                      | 65.5                 | 0.874@370                                              | [8]       |
| IrNiCu DNF/C                                                            | 0.1M HClO <sub>4</sub>               | 307                                      | 48                   | 0.053@300                                              | [9]       |
| IrCoNi PHNCs                                                            | 0.1M HClO <sub>4</sub>               | 303                                      | 53.8                 | 0.7@300                                                | [10]      |
| P-IrCu <sub>1.4</sub> NCs                                               | 0.05M H <sub>2</sub> SO <sub>4</sub> | 311                                      | 53.9                 | 0.213@320                                              | [11]      |
| SrCo <sub>0.9</sub> Ir <sub>0.1</sub> O <sub>3-σ</sub>                  | 0.1M HClO <sub>4</sub>               | 310                                      | /                    | /                                                      | [12]      |
| RuIr                                                                    | 0.1M HClO <sub>4</sub>               | 344                                      | 111.5                | /                                                      | [13]      |
| IrOOH NSs                                                               | 0.1M HClO <sub>4</sub>               | 344                                      | 58                   | /                                                      | [14]      |
| Sputtered IrO <sub>x</sub> films                                        | 0.1M HClO <sub>4</sub>               | 490                                      | 100                  | /                                                      | [15]      |

[1] Wu G, Zheng X, Cui P, et al. A general synthesis approach for amorphous noble metal nanosheets. *Nature Communications*, 2019, 10(1): 4855.

[2] Takimoto D, Ayato Y, Mochizuki D, et al. Lateral Size Effects of Two-dimensional IrO<sub>2</sub> Nanosheets towards the Oxygen Evolution Reaction Activity. *Electrochemistry*, 2017, 85(12): 779-783.

[3] Zaman W Q, Wang Z, Sun W, et al. Ni-Co codoping breaks the limitation of single-metal-doped IrO<sub>2</sub> with higher oxygen evolution reaction performance and less iridium. *ACS Energy Letters*, 2017, 2(12): 2786-2793.

[4] Oakton E, Lebedev D, Povia M, et al. IrO<sub>2</sub>-TiO<sub>2</sub>: A high-surface-area, active, and stable electrocatalyst for the oxygen evolution reaction. *ACS Catalysis*, 2017, 7(4): 2346-2352.

[5] Hao C, Lv H, Mi C, et al. Investigation of mesoporous niobium-doped TiO<sub>2</sub> as an oxygen evolution catalyst support in an SPE water electrolyzer. *ACS Sustainable Chemistry & Engineering*, 2016, 4(3): 746-756.

[6] Hu W, Chen S, Xia Q. IrO<sub>2</sub>/Nb-TiO<sub>2</sub> electrocatalyst for oxygen evolution reaction in acidic medium. *International journal of hydrogen energy*, 2014, 39(13): 6967-6976.

[7] Zhao S, Stocks A, Rasimick B, et al. Highly active, durable dispersed iridium nanocatalysts for PEM water electrolyzers. *Journal of the Electrochemical Society*, 2018, 165(2): F82.

[8] Zhang K, Mai W, Li J, et al. Highly scattered Ir oxides on TiN as an efficient oxygen evolution reaction electrocatalyst in acidic media. *Journal of Materials Science*, 2020, 55: 3507-3520.

[9] Lim J, Park D, Jeon S S, et al. Ultrathin IrO<sub>2</sub> nanoneedles for electrochemical water oxidation. *Advanced Functional Materials*, 2018, 28(4): 1704796.

[10] Feng J, Lv F, Zhang W, et al. Iridium-based multimetallic porous hollow nanocrystals for efficient overall-water-splitting catalysis. *Advanced Materials*, 2017, 29(47): 1703798.

[11] Pi Y, Guo J, Shao Q, et al. Highly efficient acidic oxygen evolution electrocatalysis enabled by porous Ir-Cu nanocrystals with three-dimensional electrocatalytic surfaces. *Chemistry of Materials*, 2018, 30(23): 8571-8578.

- [12] Chen Y, Li H, Wang J, et al. Exceptionally active iridium evolved from a pseudo-cubic perovskite for oxygen evolution in acid. *Nature Communications*, 2019, 10(1): 572.
- [13] Shan J, Ling T, Davey K, et al. Transition-metal-doped RuIr bifunctional nanocrystals for overall water splitting in acidic environments. *Advanced Materials*, 2019, 31(17): 1900510.
- [14] Weber D, Schoop L M, Wurmbbrand D, et al. IrOOH nanosheets as acid stable electrocatalysts for the oxygen evolution reaction. *Journal of Materials Chemistry A*, 2018, 6(43): 21558-21566.
- [15] Baker D R, Graziano M B, Hanrahan B M. Nanostructured antireflective iridium oxide coating for water oxidation. *The Journal of Physical Chemistry C*, 2018, 122(23): 12207-12214.
